# Supplementary material for: The Association between Gait Speed and Falls in Community Dwelling Older Adults with and without Mild Cognitive Impairment
Source: Int J Environ Res Public Health. 2021 Apr 2;18(7):3712. doi: 10.3390/ijerph18073712 (PMC8038190; doi:10.3390/ijerph18073712)
Supplement: Supplementary file 1 [file ijerph-18-03712-s001.pdf]

## Supplementary Material.

**Table 1.** Sensitivity analysis, the association (RR, 95% CI) between preferred gait speed (10 cm/second) and falls in 2,679 older adults participating in GEMS, excluding participants diagnosed with dementia by the 18-month study visit.

| Model                                                                           | Relative Risk | 95% CI       |
|---------------------------------------------------------------------------------|---------------|--------------|
| Unadjusted model                                                                | 0.93          | 0.89 to 0.97 |
| Model adjusted for age, gender, treatment, and clinic                           | 0.94          | 0.90 to 0.99 |
| Additional adjustment for MCI                                                   | 0.95          | 0.90 to 0.99 |
| Additional adjustment for fall at 12-month visit                                | 0.96          | 0.92 to 1.00 |
| With MCI, additional adjustment for interaction between MCI and gait speed*     | 0.93          | 0.85 to 1.02 |
| Without MCI , additional adjustment for interaction between MCI and gait speed* | 0.95          | 0.90 to 1.00 |

\*p=0.66 for interaction between gait speed and MCI.
